# Supplementary material
Source: publisher site journal article supplement (https://www.dovepress.com/article/537096)
Supplement: Supplementary file 1 [file Supplemental%20Tables.docx]

Supplemental Table 1. *Mediator Model*, general linear regression for Individual analyzed preoperative anxiety and acute pain.

|  | Coefficient | 95% CI | *P*-Value | VIF |
| --- | --- | --- | --- | --- |
| Anxiety | 0.605 | 0.259-0.951 | < 0.001 | 1.12 |
| Sex | -0.300 | -0.705-0.106 | 0.147 | 1.41 |
| Age | 0.016 | -0.014-0.046 | 0.298 | 1.04 |
| BMI | 0.030 | -0.020-0.081 | 0.239 | 1.03 |
| Years of education | 0.020 | -0.031-0.071 | 0.450 | 1.40 |
| Precordial pain | 0.216 | -0.100-0.532 | 0.180 | 1.10 |
| PSQI score before surgery | 0.009 | -0.033-0.050 | 0.683 | 1.15 |
| Intraoperative hypothermia | 0.290 | -0.139-0.718 | 0.184 | 1.08 |
| Intraoperative plasma infusion | -0.001 | -0.002- -0.0003 | 0.006 | 1.01 |

**Notes:** A *P* value < 0.05 was considered to indicate statistical significance.

**Abbreviations:** 95% CI, 95% Confidence Interval; VIF, variance inflation factor; BMI, Body Mass Index; PSQI, Pittsburgh Sleep Quality Index.

Supplemental Table 2. *Mediator Model*, general linear regression for Individual analyzed preoperative depression and acute pain

|  | Coefficient | 95% CI | *P*-Value | VIF |
| --- | --- | --- | --- | --- |
| Depression | 0.395 | 0.020-0.770 | 0.039 | 1.05 |
| Sex | -0.284 | -0.700-0.131 | 0.178 | 1.41 |
| Age | 0.019 | -0.012-0.050 | 0.218 | 1.03 |
| BMI | 0.028 | -0.024-0.080 | 0.284 | 1.03 |
| Years of education | 0.014 | -0.039-0.066 | 0.608 | 1.39 |
| Precordial pain | 0.216 | -0.058-0.587 | 0.107 | 1.09 |
| PSQI score before surgery | 0.020 | -0.021-0.062 | 0.332 | 1.10 |
| Intraoperative hypothermia | 0.276 | -0.163-0.715 | 0.216 | 1.08 |
| Intraoperative plasma infusion | -0.001 | -0.002- -0.0003 | 0.007 | 1.01 |

**Notes:** A *P* value < 0.05 was considered to indicate statistical significance.

**Abbreviations:** 95% CI, 95% Confidence Interval; VIF, variance inflation factor; BMI, Body Mass Index; PSQI, Pittsburgh Sleep Quality Index.

Supplemental Table 3. *Outcome Model*, logistic regression for Individual analyzed preoperative anxiety and CPSP.

|  | OR | 95% CI | *P*-Value |
| --- | --- | --- | --- |
| Anxiety | 2.691 | 1.195-6.063 | 0.017 |
| TWA pain score within 5d | 1.922 | 1.324-2.788 | <0.001 |
| Sex | 0.417 | 0.159-1.098 | 0.077 |
| Age | 0.976 | 0.909-1.047 | 0.495 |
| BMI | 1.019 | 0.904-1.149 | 0.756 |
| Years of education | 1.004 | 0.887-1.136 | 0.954 |
| Precordial pain | 1.627 | 0.774-3.420 | 0.199 |
| PSQI score before surgery | 0.950 | 0.862-1.048 | 0.310 |
| Intraoperative hypothermia | 2.457 | 0.918-6.579 | 0.074 |
| Intraoperative plasma infusion | 0.998 | 0.996-1.000 | 0.109 |

**Notes:** Hosmer-Lemeshow goodness of fit test: χ2 = 3.9, df = 8, *P* Value = 0.867; A *P* value < 0.05 was considered to indicate statistical significance.

**Abbreviations:** CPSP, Chronic Postsurgical Pain; OR, Odds Ratio; 95% CI, 95% Confidence Interval; TWA, Time-weighted Average; BMI, Body Mass Index; PSQI, Pittsburgh Sleep Quality Index.

Supplemental Table 4. *Outcome Model*, logistic regression for Individual analyzed preoperative depression and CPSP.

|  | OR | 95% CI | *P*-Value |
| --- | --- | --- | --- |
| Depression | 2.785 | 1.212-6.399 | 0.016 |
| TWA pain score within 5d | 2.021 | 1.397-2.924 | <0.001 |
| Sex | 0.435 | 0.166-1.143 | 0.091 |
| Age | 0.985 | 0.916-1.058 | 0.671 |
| BMI | 1.011 | 0.893-1.144 | 0.864 |
| Years of education | 0.999 | 0.882-1.132 | 0.990 |
| Precordial pain | 1.774 | 0.832-3.780 | 0.138 |
| PSQI score before surgery | 0.963 | 0.876-1.059 | 0.436 |
| Intraoperative hypothermia | 2.292 | 0.862-6.098 | 0.097 |
| Intraoperative plasma infusion | 0.998 | 0.996-1.000 | 0.125 |

**Notes:** Hosmer-Lemeshow goodness of fit test: χ2 = 5.0, df = 8, *P* Value = 0.759; A *P* value < 0.05 was considered to indicate statistical significance.

**Abbreviations:** CPSP, Chronic Postsurgical Pain; OR, Odds Ratio; 95% CI, 95% Confidence Interval; TWA, Time-weighted Average; BMI, Body Mass Index; PSQI, Pittsburgh Sleep Quality Index.

Supplemental Table 5. *Mediator Model*, general linear regression for categorical analyzed preoperative psychological symptoms and acute pain.

|  | Coefficient | 95% CI | *P*-Value | VIF |
| --- | --- | --- | --- | --- |
| Preoperative psychological symptoms | | | | |
| No symptoms | Ref. | | | |
| Anxiety alone | 0.656 | 0.259-1.054 | 0.001 | 1.15 |
| Depression alone | 0.450 | -0.013-0.914 | 0.057 | 1.12 |
| Combined anxiety and depression | 0.834 | 0.260-1.407 | 0.005 | 1.25 |
| Sex | -0.291 | -0.698-0.115 | 0.159 | 1.44 |
| Age | 0.014 | -0.016-0.044 | 0.363 | 1.06 |
| BMI | 0.032 | -0.018-0.083 | 0.207 | 1.03 |
| Years of education | 0.018 | -0.034-0.069 | 0.501 | 1.42 |
| Precordial pain | 0.234 | -0.080-0.548 | 0.143 | 1.10 |
| PSQI score before surgery | 0.004 | -0.038-0.047 | 0.851 | 1.24 |
| Intraoperative hypothermia | 0.238 | -0.196-0.671 | 0.281 | 1.12 |
| Intraoperative plasma infusion | -0.001 | -0.002- -0.0003 | 0.008 | 1.02 |

**Notes:** A *P* value < 0.05 was considered to indicate statistical significance.

**Abbreviations:** 95% CI, 95% Confidence Interval; VIF, variance inflation factor; BMI, Body Mass Index; PSQI, Pittsburgh Sleep Quality Index; Ref., Reference.

Supplemental Table 6. *Outcome Model*, logistic regression for categorical analyzed preoperative psychological symptoms and CPSP.

|  | OR | 95% CI | *P*-Value |
| --- | --- | --- | --- |
| Preoperative psychological symptoms | |  |  |
| No symptoms | Ref. | | |
| Anxiety alone | 3.001 | 1.156-7.790 | 0.024 |
| Depression alone | 3.572 | 1.233-10.352 | 0.019 |
| Combined anxiety and depression | 5.293 | 1.393-20.119 | 0.014 |
| TWA pain score within 5d | 1.849 | 1.264-2.704 | 0.002 |
| Sex | 0.415 | 0.154-1.120 | 0.082 |
| Age | 0.973 | 0.903-1.047 | 0.461 |
| BMI | 1.028 | 0.907-1.164 | 0.668 |
| Years of education | 1.001 | 0.881-1.138 | 0.984 |
| Precordial pain | 1.805 | 0.837-3.891 | 0.132 |
| PSQI score before surgery | 0.938 | 0.846-1.039 | 0.222 |
| Intraoperative hypothermia | 2.258 | 0.816-6.250 | 0.117 |
| Intraoperative plasma infusion | 0.998 | 0.996-1.000 | 0.117 |

**Notes:** Hosmer-Lemeshow goodness of fit test: χ2 = 5.6, df = 8, *P* Value = 0.691; A *P* value < 0.05 was considered to indicate statistical significance.

**Abbreviations:** CPSP, Chronic Postsurgical Pain; OR, Odds Ratio; 95% CI, 95% Confidence Interval; TWA, Time-weighted Average; BMI, Body Mass Index; PSQI, Pittsburgh Sleep Quality Index; Ref., Reference.
